# Supplementary material for: Activity of Estafietin and Analogues on Trypanosoma cruzi and Leishmania braziliensis
Source: PubMed Central journal article supplement (PMC6479983; doi:10.3390/molecules24071209), 2019-03-28
Supplement: molecules-24-01209-s001.pdf [file molecules-24-01209-s001.pdf]

## Supplementary Materials

### Activity of estafietin and analogues on *Trypanosoma cruzi* and *Leishmania braziliensis*

Valeria P. Sülsen<sup>1,2,ψ,\*</sup>, Emilio F. Lizarraga<sup>3,ψ</sup>, Orlando G. Elso<sup>1,2</sup>, Natacha Cerny<sup>4</sup>, Andrés Sanchez Alberti<sup>5</sup>, Augusto E. Bivona<sup>5</sup>, Emilio L. Malchiodi<sup>5</sup>, Silvia I. Cazorla<sup>5,6</sup>, and César A. N. Catalán<sup>7,\*</sup>

- <sup>1</sup> CONICET – Universidad de Buenos Aires. Instituto de Química y Metabolismo del Fármaco - CONICET (IQUIMEFA), Junín 956 2°P (1113). Buenos Aires, Argentina; vsulsen@ffyb.uba.ar (VPS), orlandoelso@hotmail.com (OGE).
- <sup>2</sup> Universidad de Buenos Aires, Cátedra de Farmacognosia, Facultad de Farmacia y Bioquímica, Junín 956 2°P (1113). Buenos Aires, Argentina.
- <sup>3</sup> Instituto de Fisiología Animal, Fundación Miguel Lillo and Facultad de Ciencias Naturales e Instituto Miguel Lillo, Universidad Nacional de Tucumán, Tucumán, Argentina; eflizarraga@lillo.org.ar (EFL)
- <sup>4</sup> CONICET - Universidad Nacional de Luján. Instituto de Ecología y Desarrollo Sustentable (INEDES). Ruta 5 y Avenida Constitución - (6700). Luján, Argentina; natachacerny@gmail.com (NC).
- <sup>5</sup> Universidad de Buenos Aires, Facultad de Farmacia y Bioquímica, Cátedra de Inmunología. Junín 956 2°P (1113). Buenos Aires, Argentina. Instituto de Estudios de la Inmunidad Humoral (IDEHU), UBA-CONICET. Junín 956 4°P (1113), Buenos Aires, Argentina; CONICET- Universidad de Buenos Aires. Instituto de Microbiología y Parasitología Médica - CONICET (IMPaM), Facultad de Medicina. Paraguay 2155. Piso 13, Buenos Aires, Argentina; augustobivona@gmail.com (AEB), andres.sanchez.alberti@gmail.com (ASA), emalchio@ffyb.uba.ar (ELM).
- <sup>6</sup> CONICET – Centro de Referencia para Lactobacilos (CERELA). Batalla de Chacabuco 145. San Miguel de Tucumán, Argentina; silcazorla@yahoo.es (SIC).
- <sup>7</sup> CONICET – Universidad Nacional de Tucumán. Instituto de Química del Noroeste - CONICET (INQUINOA). Ayacucho 471 (T4000INI). San Miguel de Tucumán, Argentina; ccatalan@fbqf.unt.edu.ar, cancatalan@gmail.com (CANC).

\* Correspondence: vsulsen@ffyb.uba.ar (VPS); ccatalan@fbqf.unt.edu.ar, cancatalan@gmail.com (CANC).

ψ These authors contributed equally to this work.

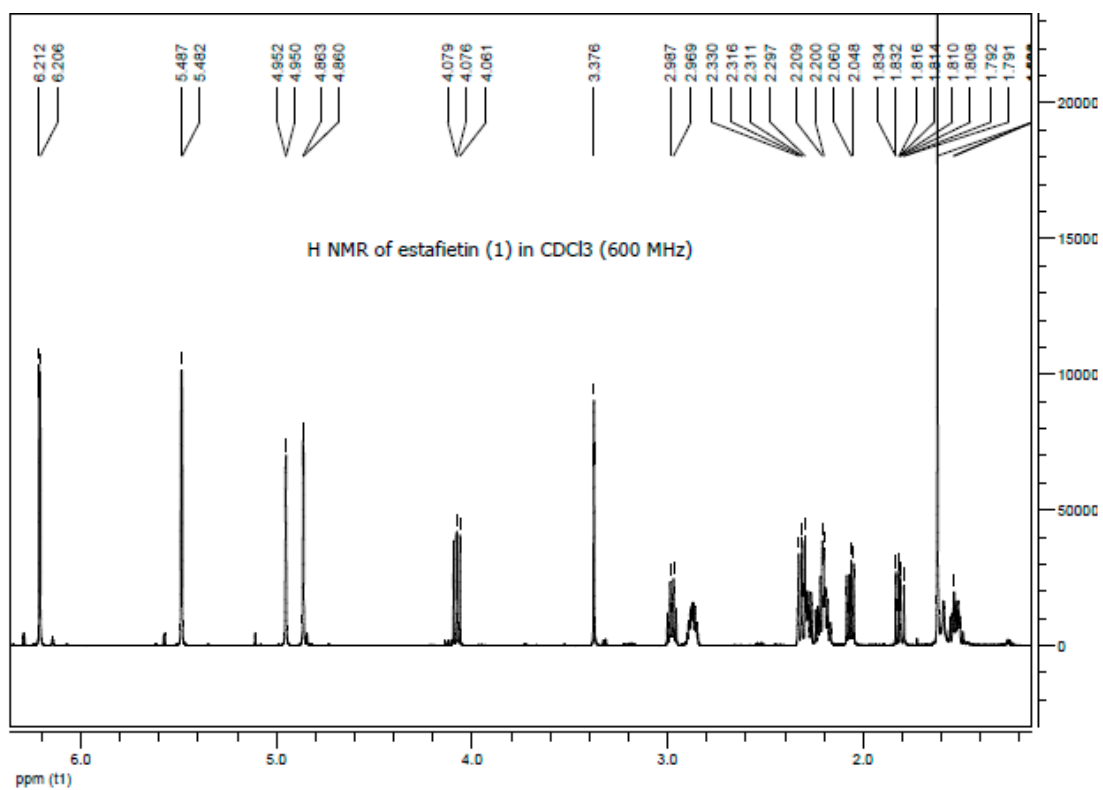

Figure S1. <sup>1</sup>H-NMR of estafietin (1)

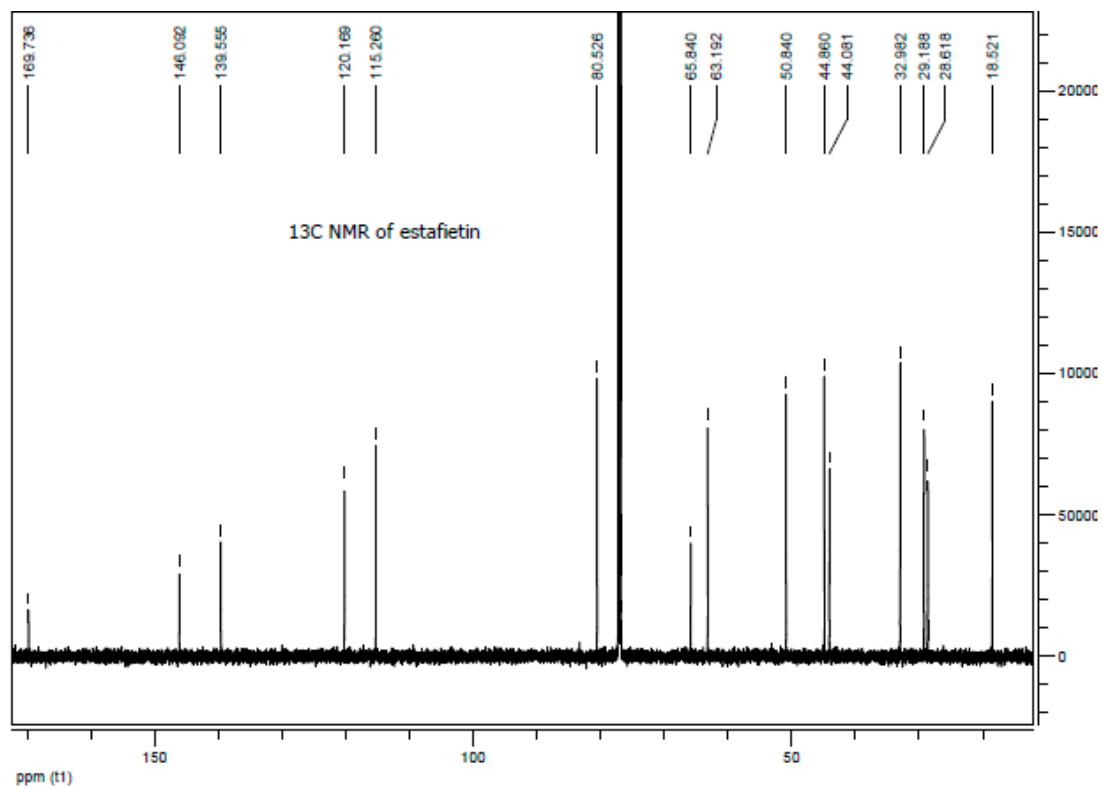

Figure S2. <sup>13</sup>C-NMR of estafietin (1)

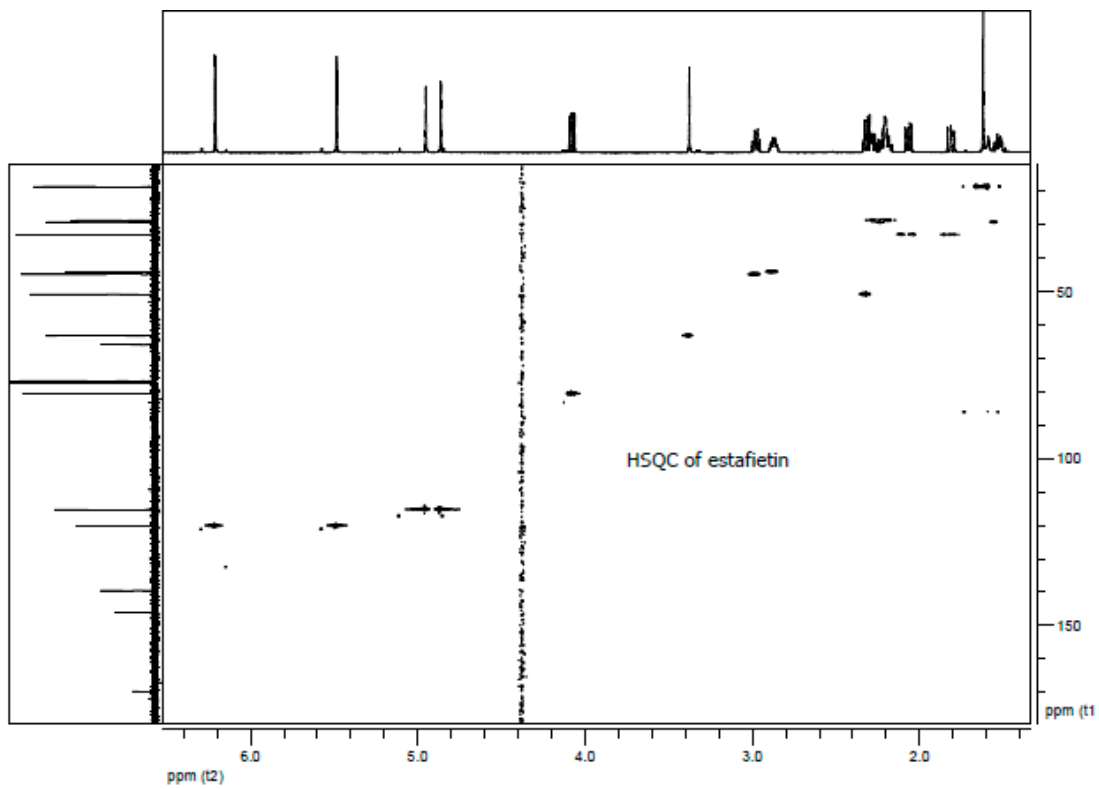

Figure S3. HSQC of estafietin (1)

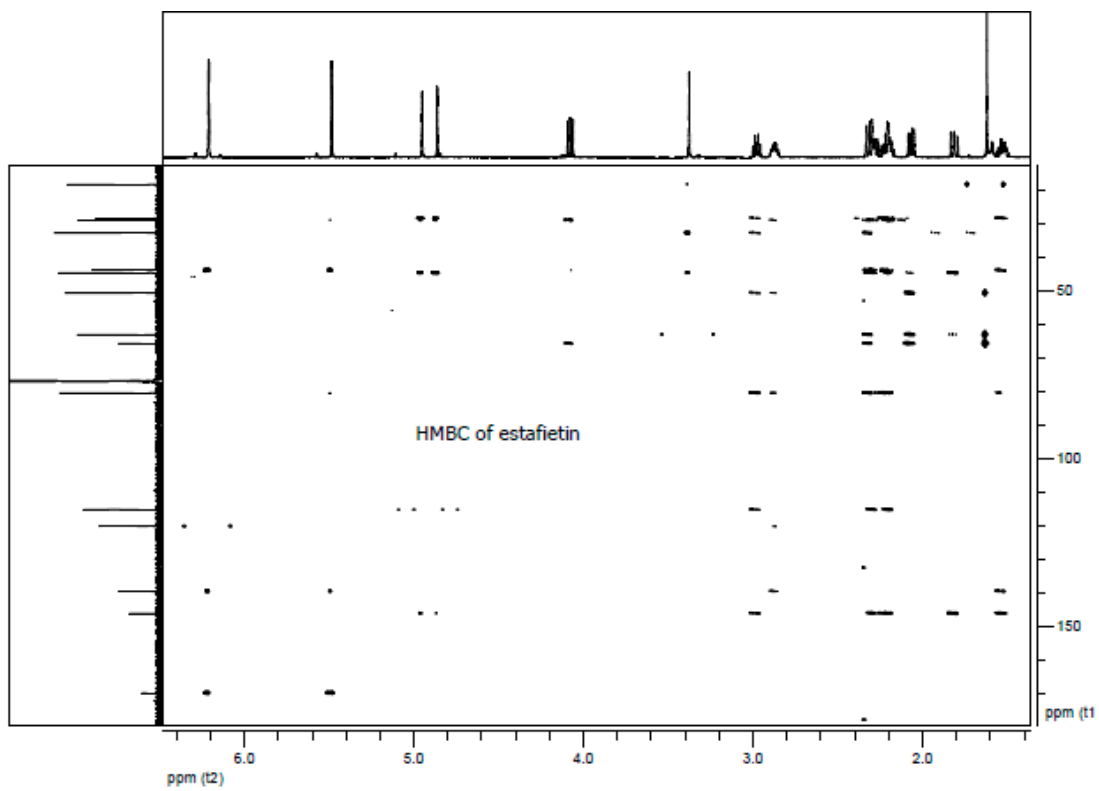

Figure S4. HMBC of estafietin (1)

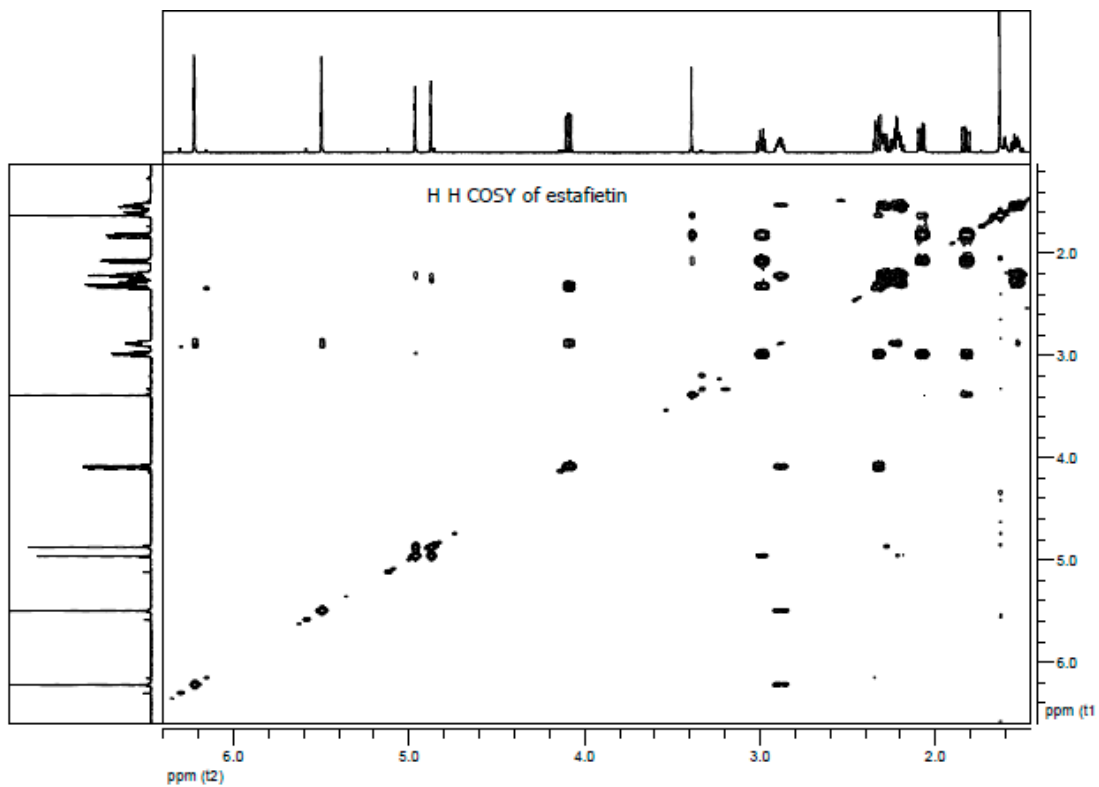

Figure S5. H H COSY of estafietin (1)

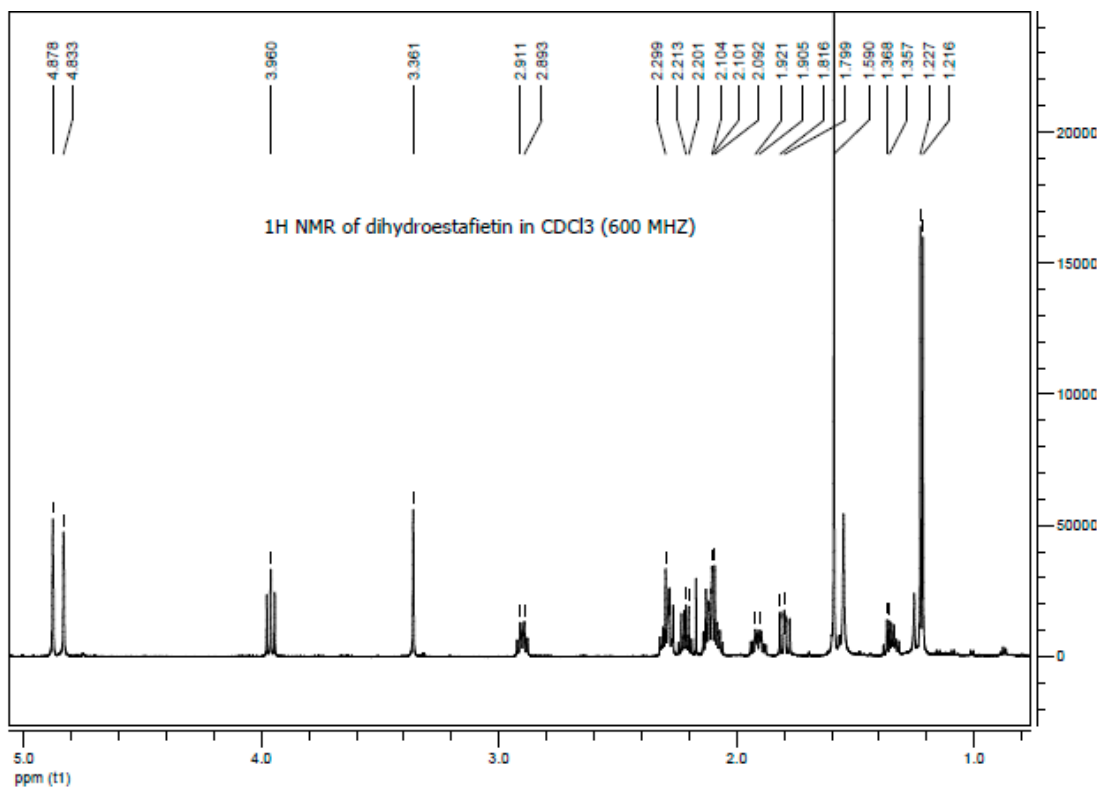

Figure S6.  $^1\text{H}$ -NMR of 11 $\beta$ H,13-dihydroestafietin (2)

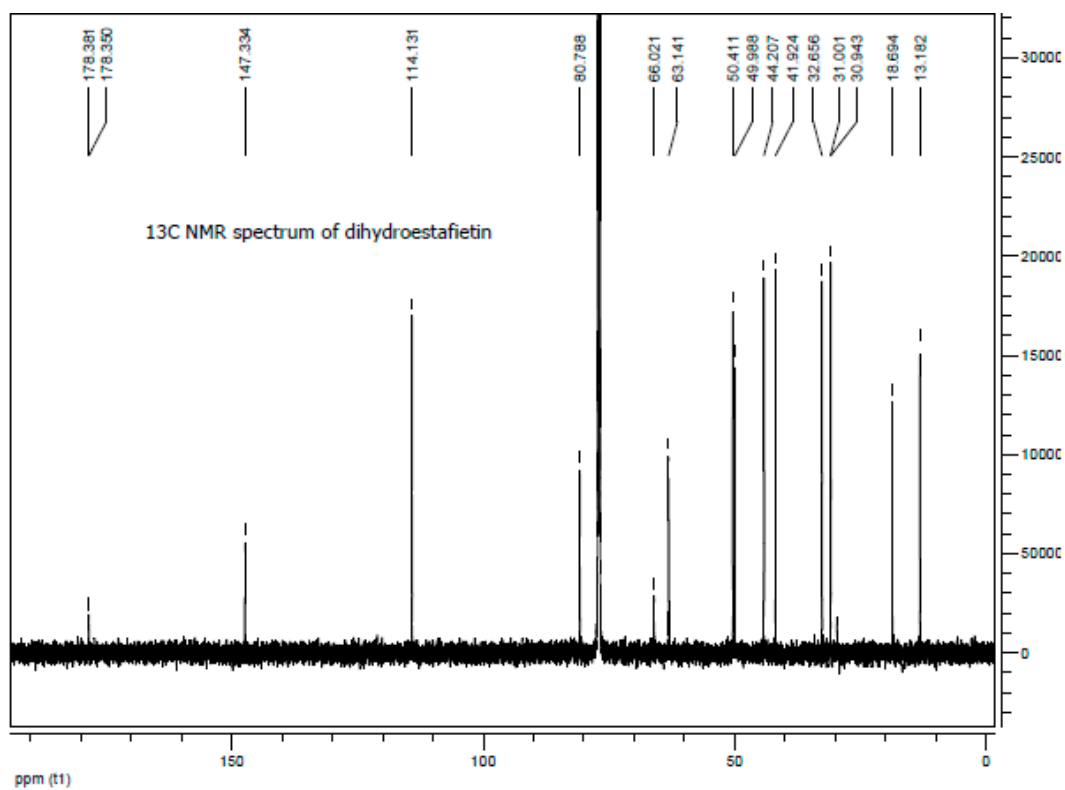

Figure S7. <sup>13</sup>C-NMR of 11βH,13-dihydroestafietin (2)

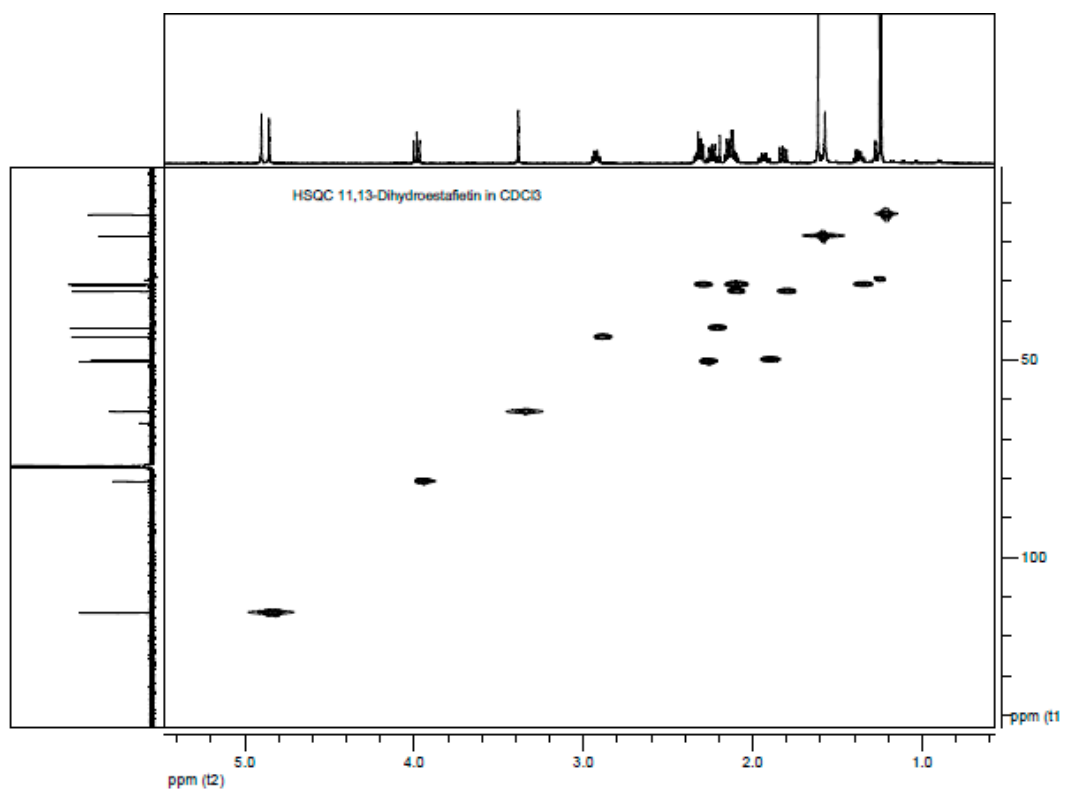

Figure S8. HSQC of 11βH,13-dihydroestafietin (2)

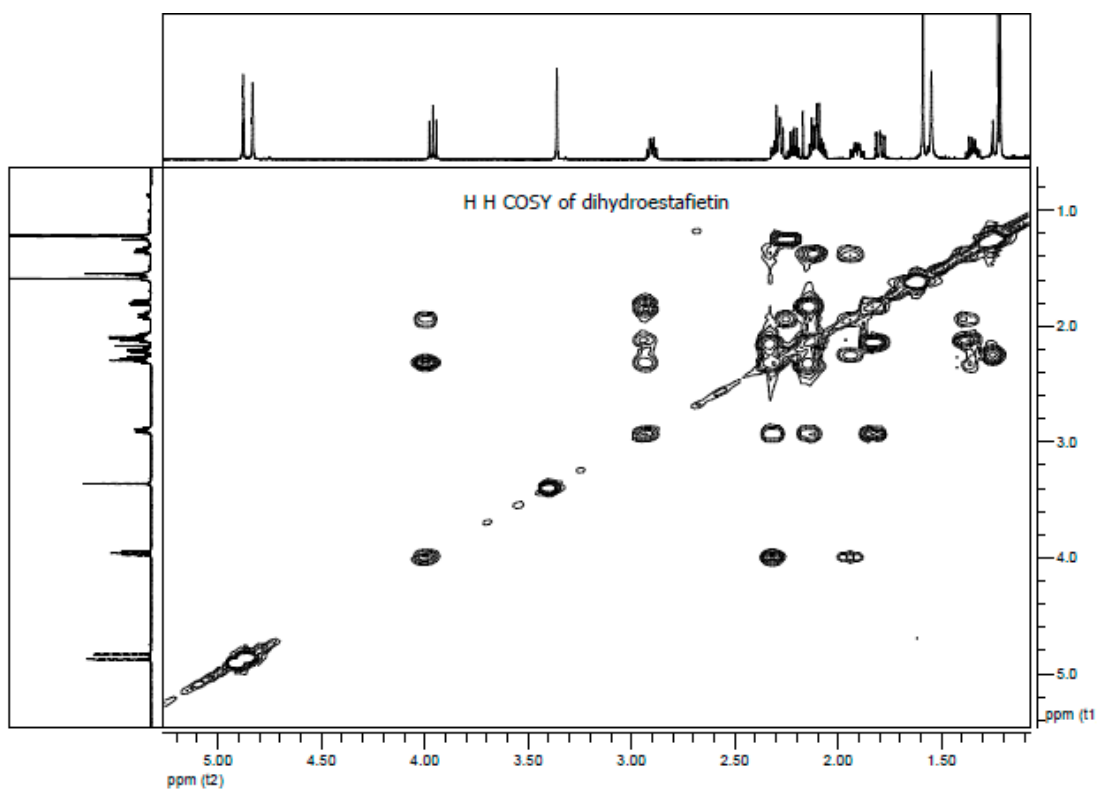

Figure S9. H H COSY of 11 $\beta$ H,13-dihydroestafietin (2)

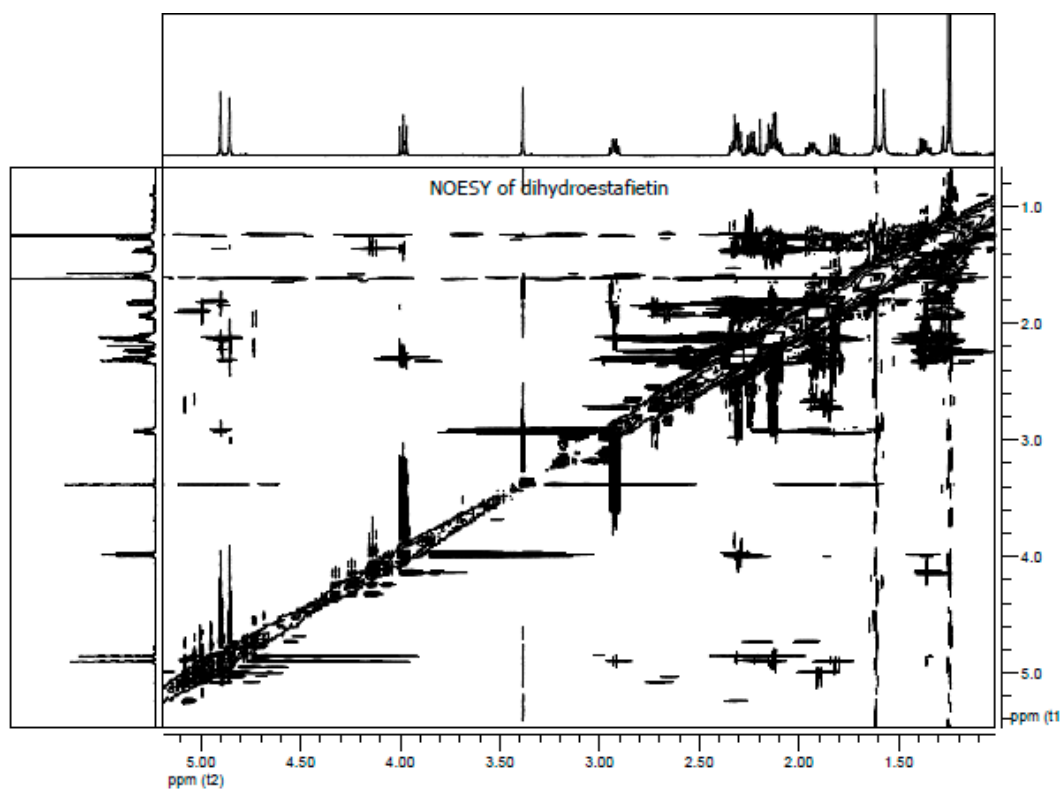

Figure S10. NOESY of 11 $\beta$ H,13-dihydroestafietin (2)

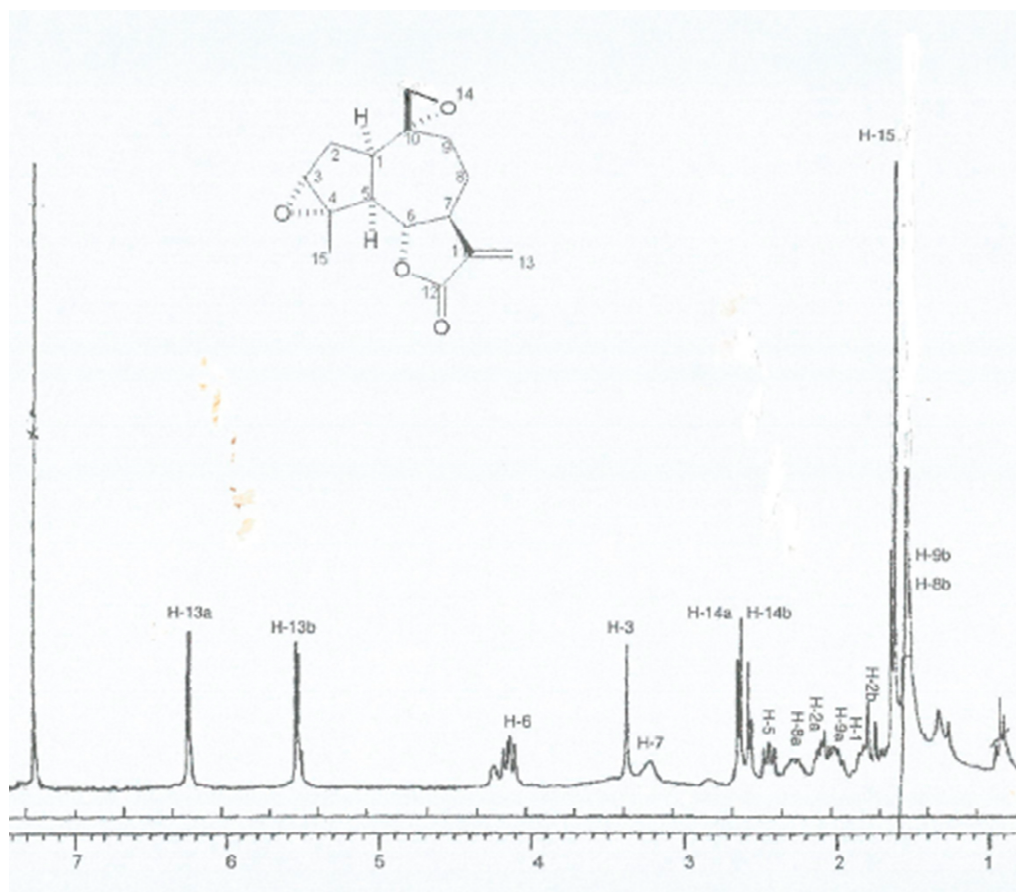

Figure S11. <sup>1</sup>H-NMR of α-epoxyestafietin (3a)

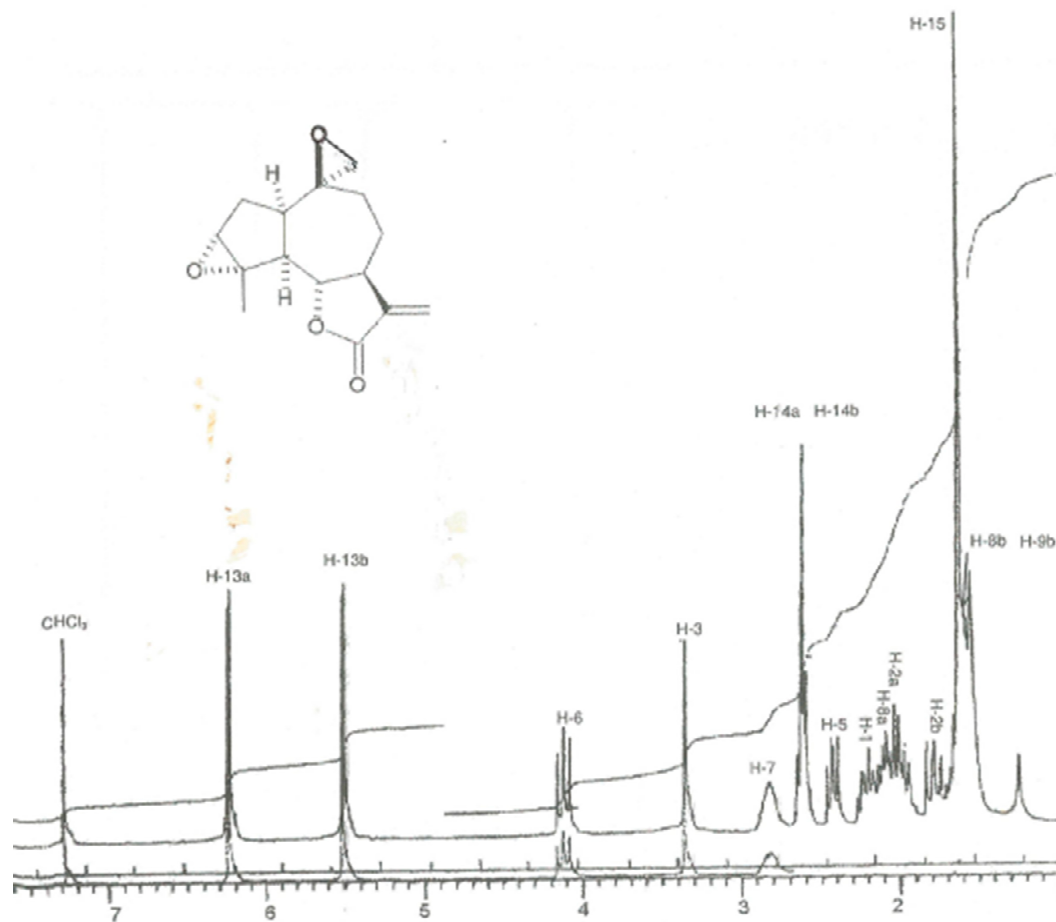

Figure S12. <sup>1</sup>H-NMR of β-epoxyestafietin (**3b**)



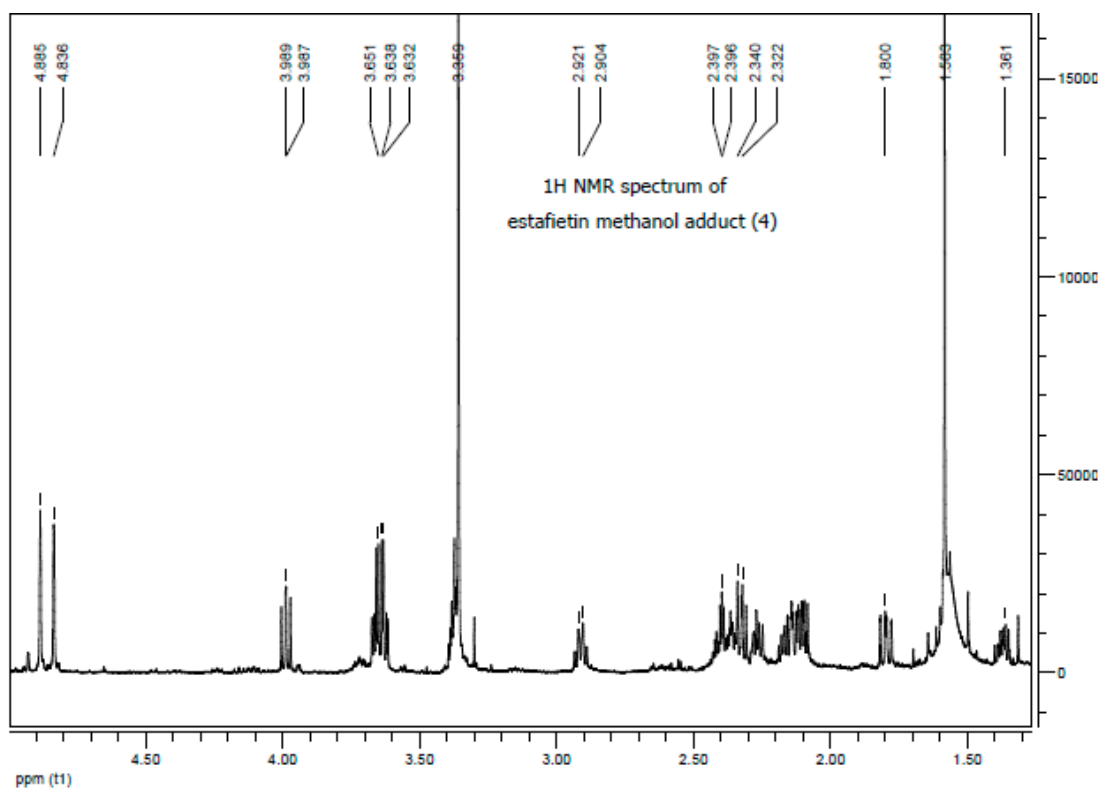

Figure S13. <sup>1</sup>H-NMR of 11βH,13-methoxyestafietin (4)

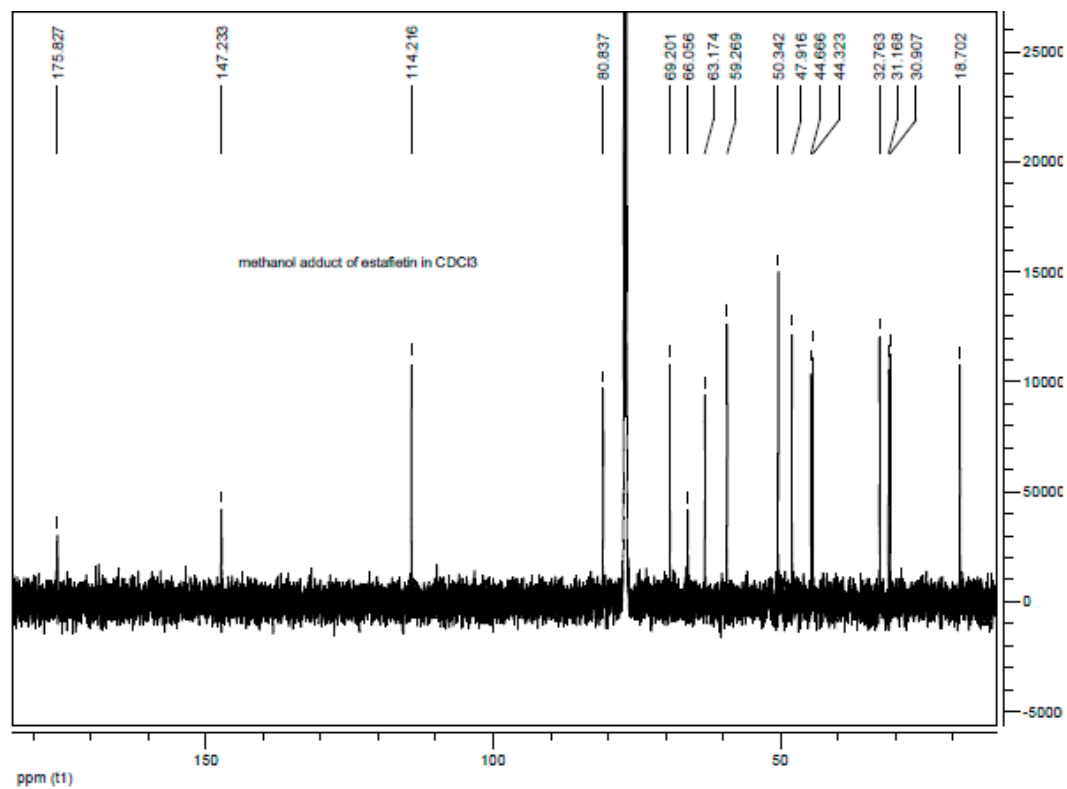

Figure S14. <sup>13</sup>C-NMR of 11βH,13-methoxyestafietin (4)

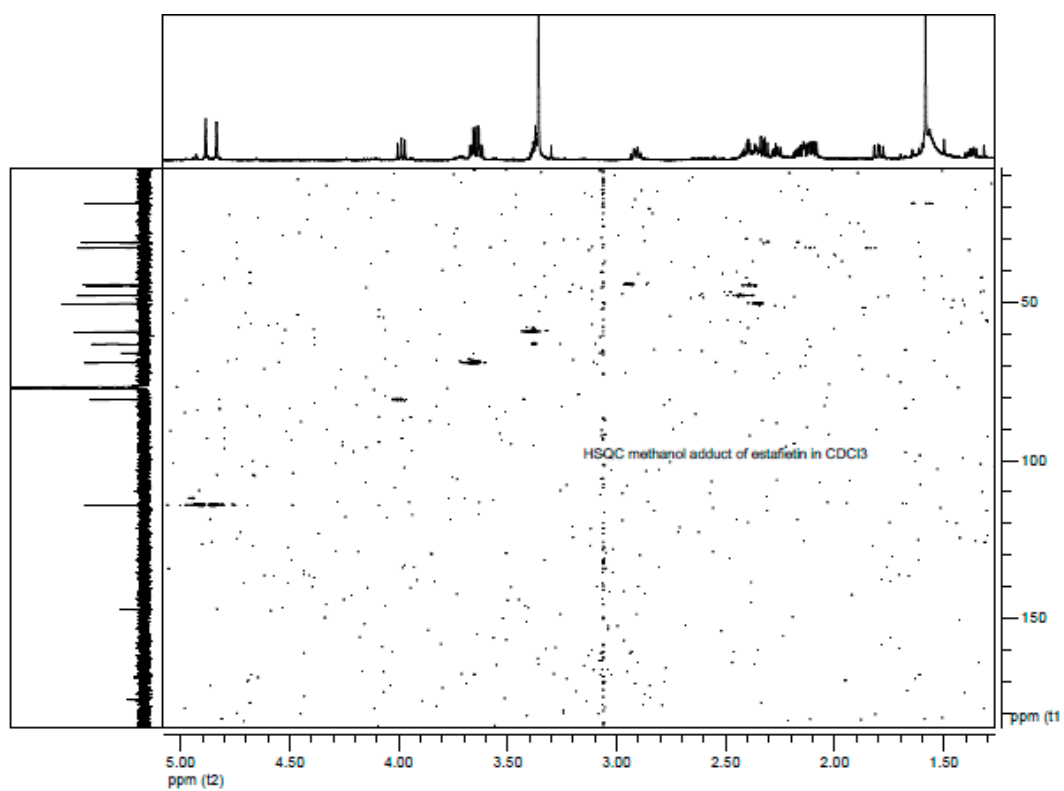

Figure S15. HSQC of 11 $\beta$ H,13-methoxyestafietin (4)

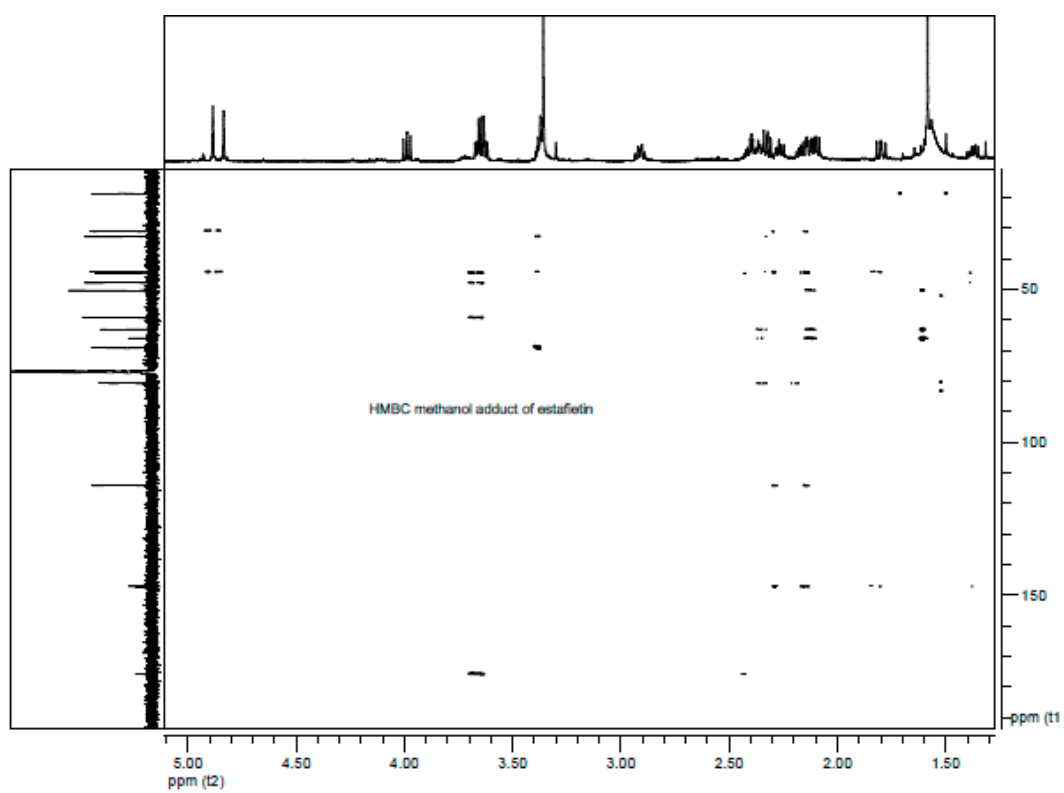

Figure S16. HMBC of 11 $\beta$ H,13-methoxyestafietin (4)

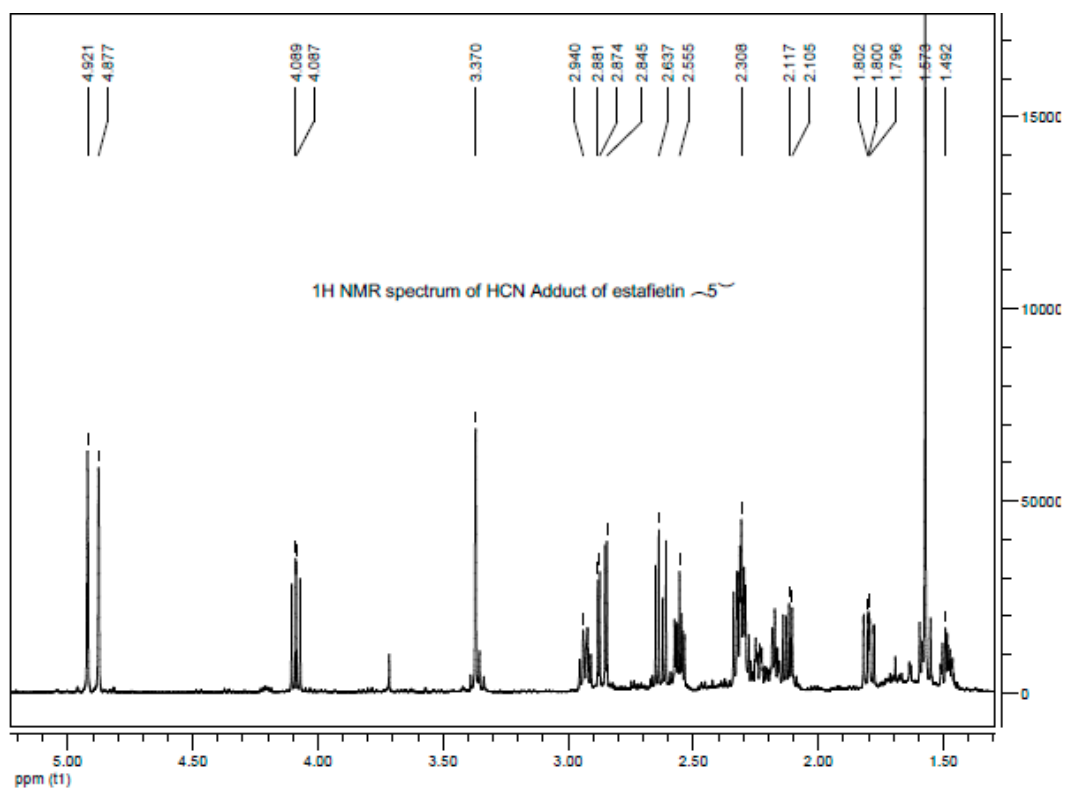

Figure S17.  $^1\text{H}$ -NMR of 11 $\beta$ H,13-cianoestafietin (5)

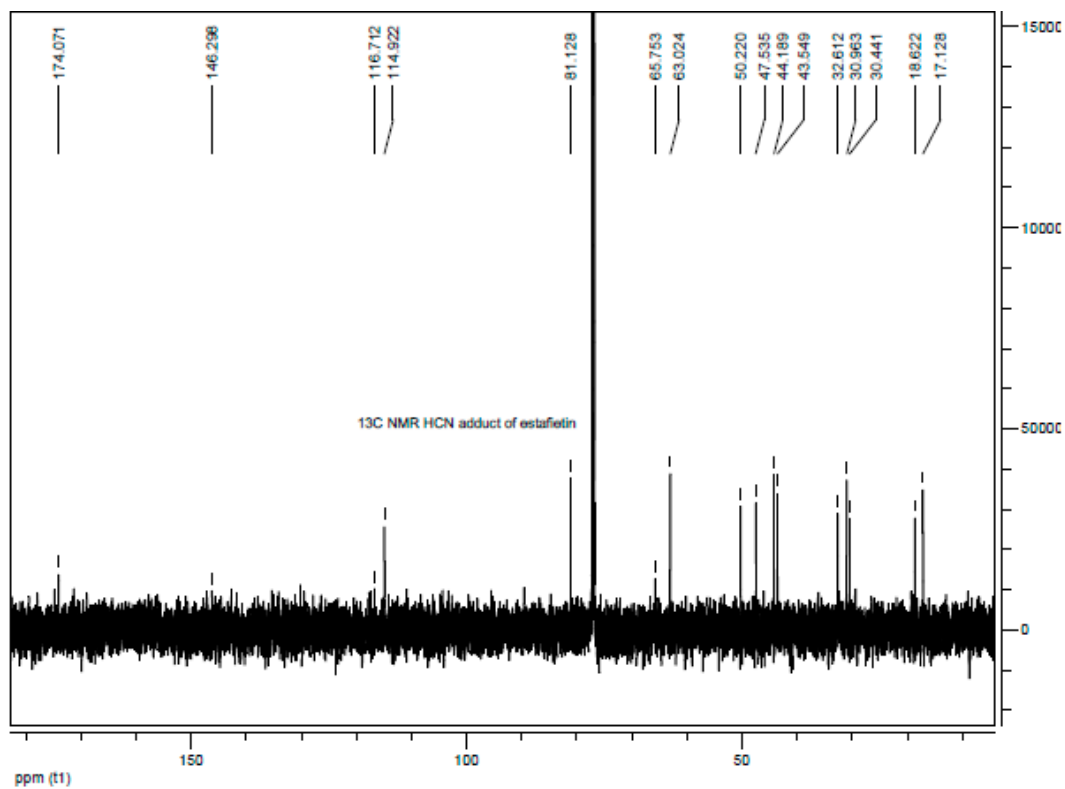

Figure S18.  $^{13}\text{C}$ -NMR of 11 $\beta$ H,13-cianoestafietin (5)

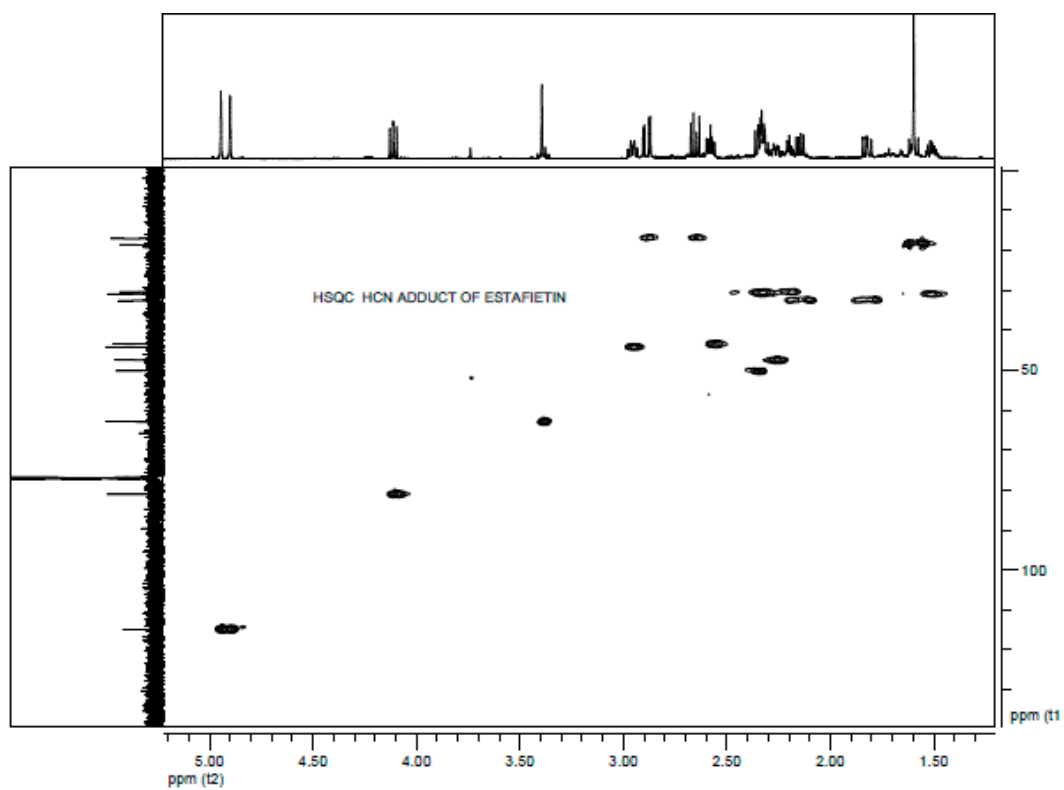

Figure S19. HSQC of 11 $\beta$ H,13-cianoestafietin (5)

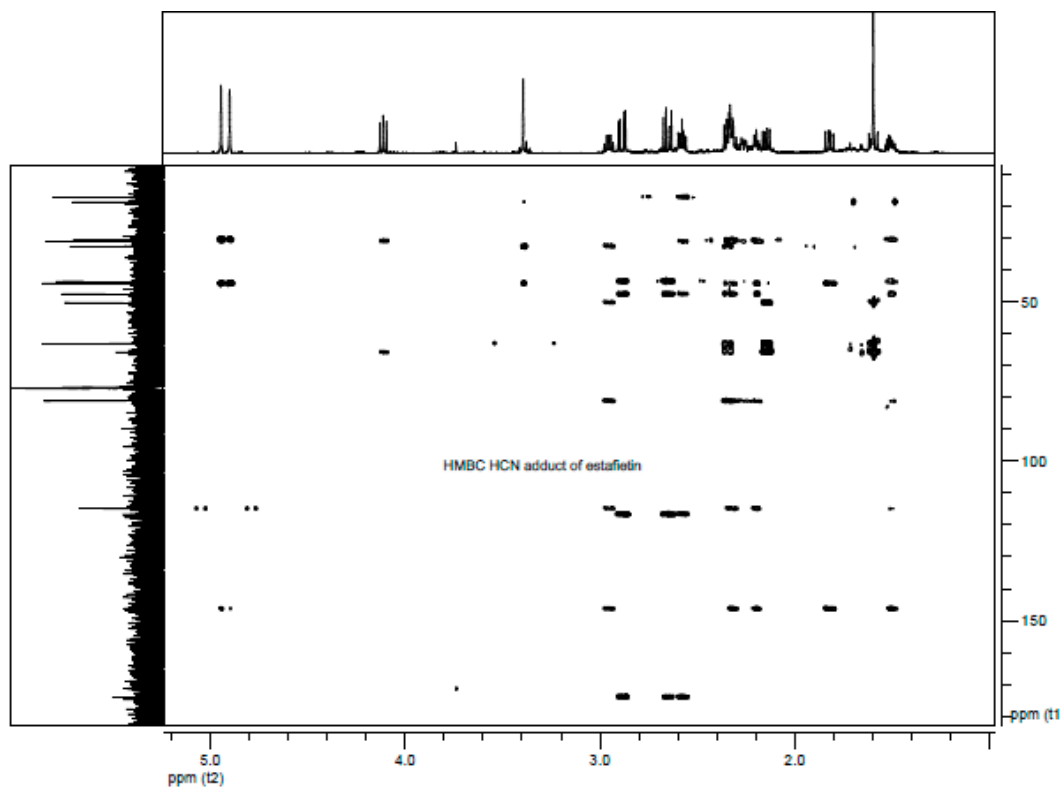

Figure S20. HMBC of 11 $\beta$ H,13-cianoestafietin (5)

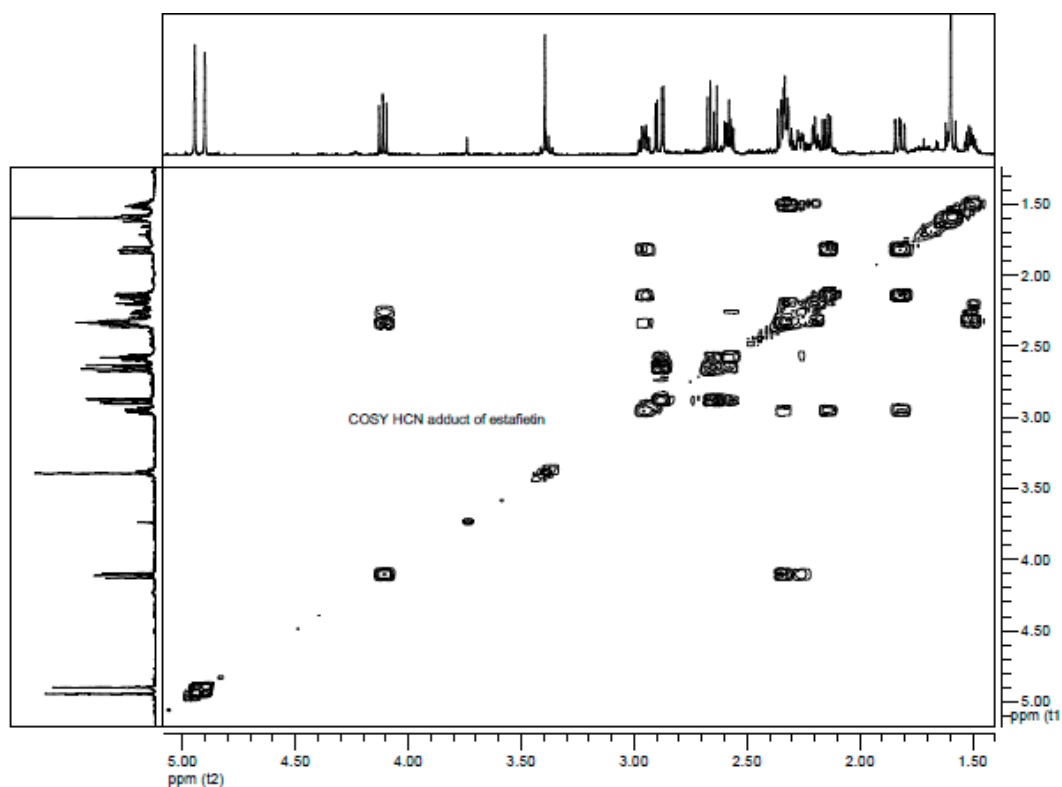

Figure S21. H H COSY of 11 $\beta$ H,13-cianoestafietin (5)

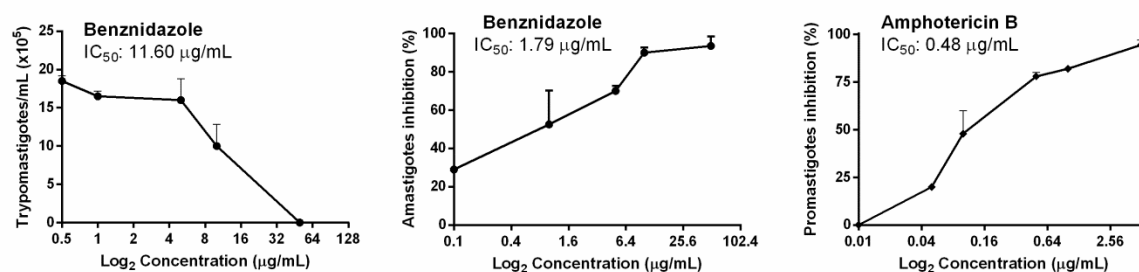

Figure S22. Activity of the reference drugs benznidazole and amphotericin B determined by *in vitro* assays against trypomastigotes and amastigotes of *T. cruzi* and promastigotes of *L. braziliensis*, respectively.
